SUMMER 2016 | VOLUME 28 | NUMBER 3

The Journal of  
**Neuropsychiatry**  
and Clinical Neurosciences

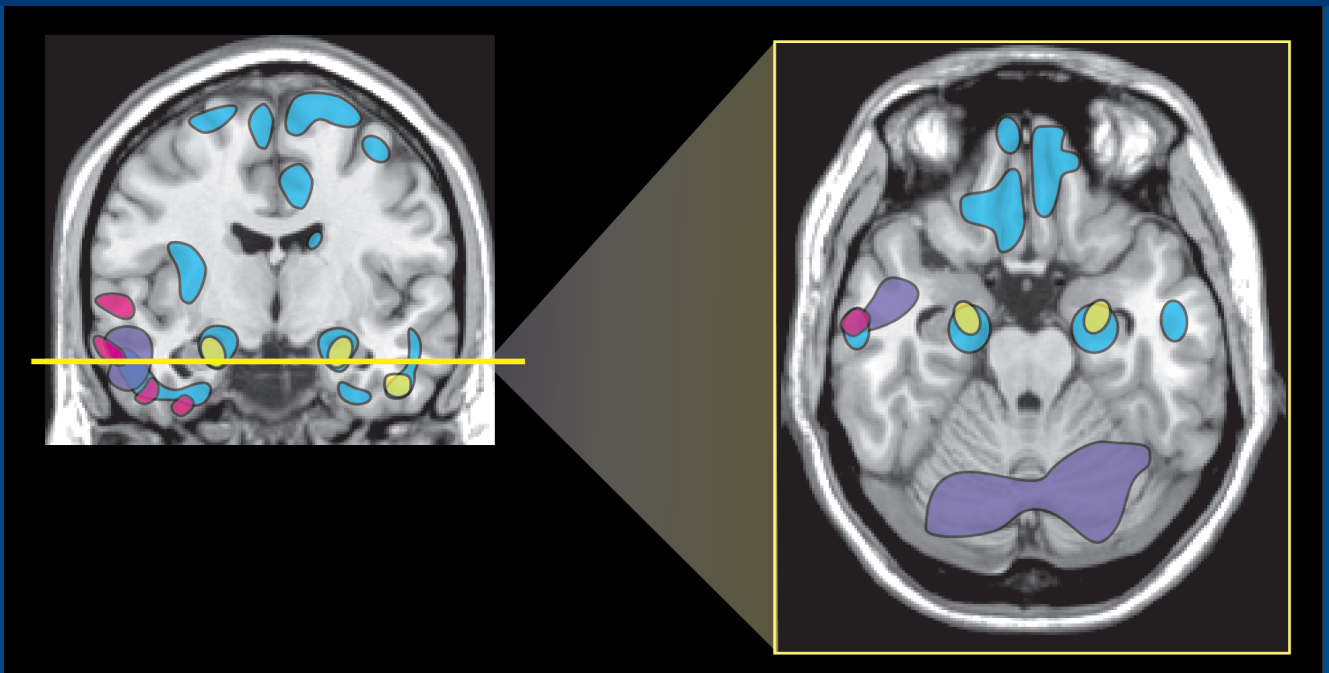

Functional Neuroanatomy and Neurophysiology of Functional  
Neurological Disorders (Conversion Disorder)

Lesion-Related Delusional Misidentification Syndromes:  
A Comprehensive Review of Reported Cases

Quantifying Post-Stroke Apathy With Actimeters

Psychiatric Symptoms in the Initial Motor Stage of Parkinson's Disease

The Effect of Intravenous Citalopram on the Neural Substrates  
of Obsessive-Compulsive Disorder

Official Journal of the American Neuropsychiatric Association  
[neuro.psychiatryonline.org](http://neuro.psychiatryonline.org)
